# Supplementary material for: Quantitative syntheses of permethylated closo-1,10-R2C2B8Me8 (R = H, Me) carboranes. Egg-shaped hydrocarbons on the Frontier between inorganic and organic chemistry
Source: Royal Society of Chemistry journal article supplement (doi:10.1039/c8ra06640j), 2018-01-01
Supplement: c8ra06640j1.pdf [file c8ra06640j1.pdf]

## Supplementary Information

### Quantitative Syntheses of Permethylated *closo*-1,10- $R_2C_2B_8Me_8$ ( $R = H, Me$ ) Carboranes. Egg-shaped Hydrocarbons on the Frontier between Inorganic and Organic Chemistry

Mario Bakardjiev, Aleš Růžička, Zdeňka Růžičková, Josef Holub, Oleg L. Tok Drahomír  
Hnyk, Jindřich Fanfrlík, and Bohumil Štíbr,\*

*RSC Advan.*

### Selected NMR measurements ( $CDCl_3$ )

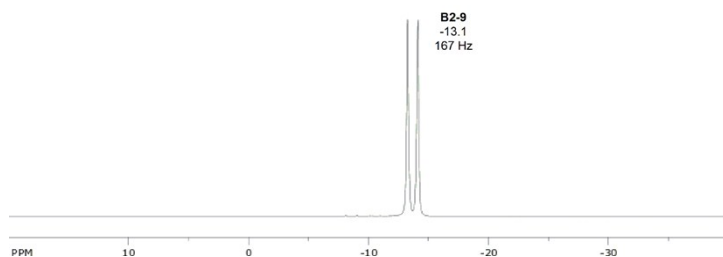

**Figure S.1** 190.2 MHz  $^{11}B$  NMR spectrum of the starting *closo*-1,10- $H_2C_2B_8H_8$  (**1a**). Ordered as assignment/ $\delta(^{11}B$  in ppm relative to  $BF_3OEt_2$ )/ $^1J_{BH}$  in Hz.

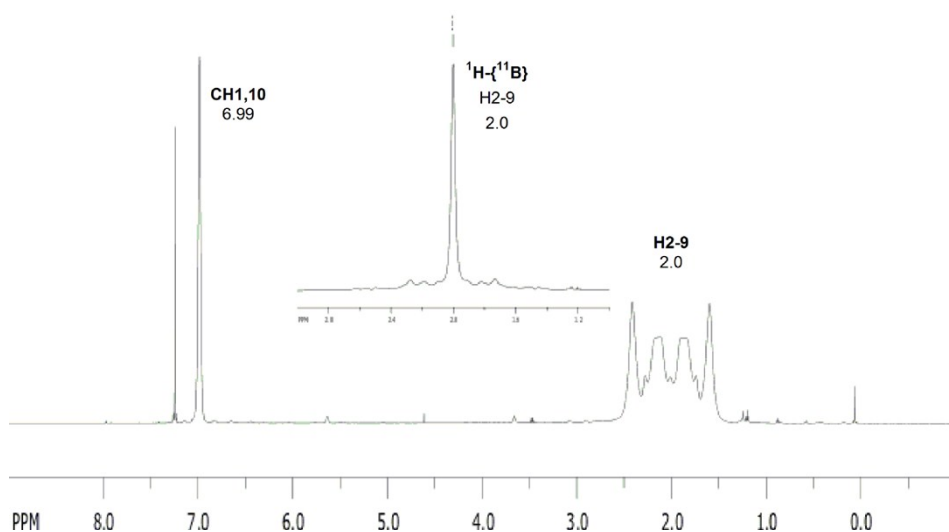

**Figure S2.** 600 MHz  $^1H$  NMR spectrum of the starting *closo*-1,10- $H_2C_2B_8H_8$  (**1a**). Ordered as assignment/ $\delta(^1H$  in ppm, relative to TMS). The quartet at 2.0 ppm reflects the  $^1J_{BH}$  coupling.

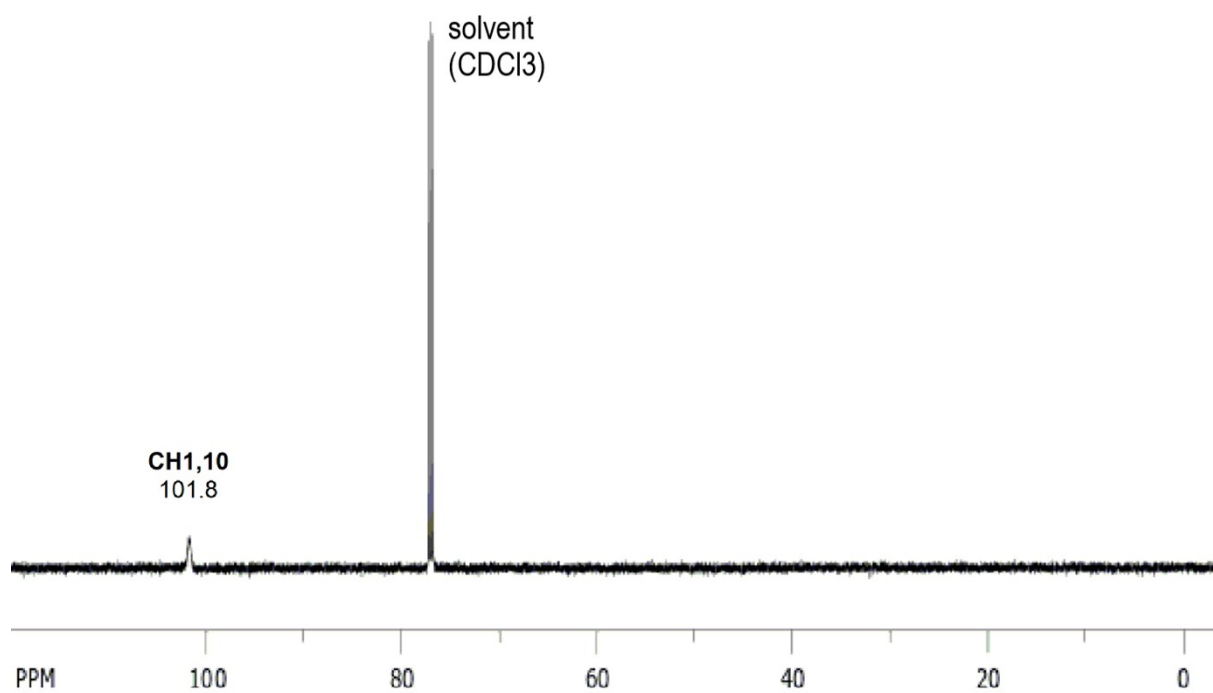

**Figure S3.** 150.9 MHz  $^{13}\text{C}$ - $\{^1\text{H}\}$  NMR spectrum of the starting *closo*-1,10- $\text{H}_2\text{C}_2\text{B}_8\text{H}_8$  (**1a**). Ordered as assignment/ $\delta(^{13}\text{C}$  in ppm, relative to TMS).

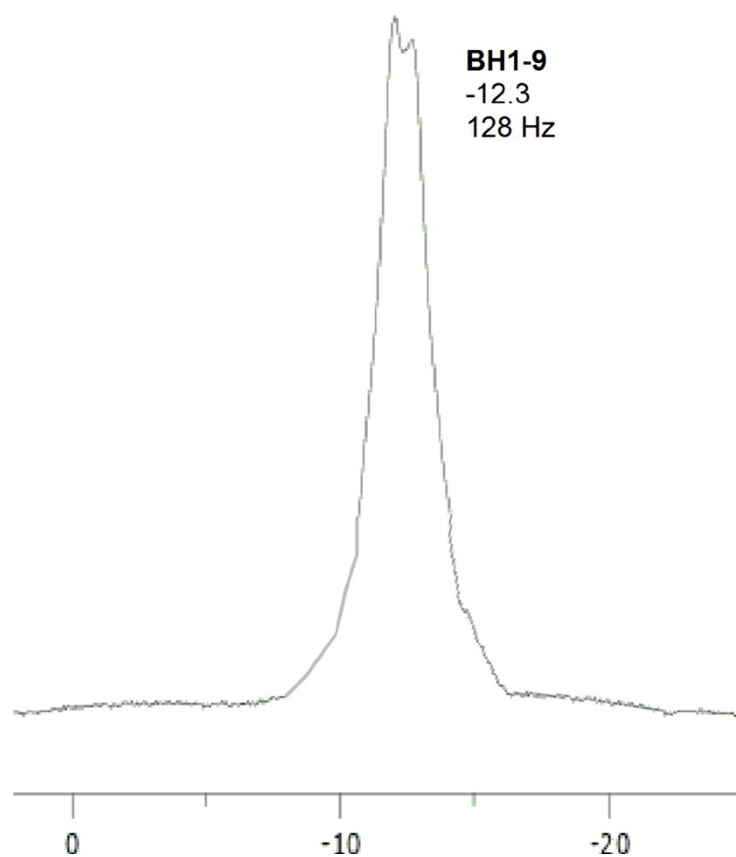

**Figure S4.** 190.2 MHz  $^{11}\text{B}$  NMR spectrum of the starting *closo*-1,10- $\text{Me}_2\text{C}_2\text{B}_8\text{H}_8$  (**1b**). Ordered as assignment/ $\delta(^{11}\text{B}$  in ppm relative to  $\text{BF}_3\text{OEt}_2$ / $^1J_{\text{BH}}$  in Hz. The BH doublet is less pronounced, probably because of the effect of the CMe groups.

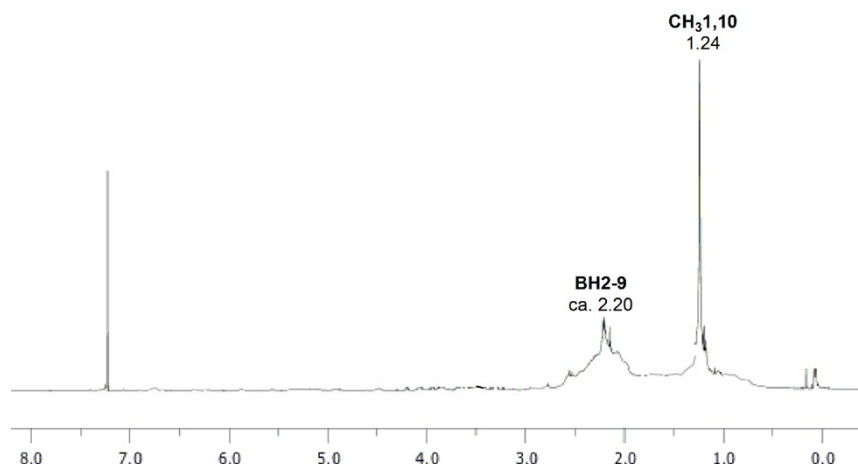

**Figure S5.** 600 MHz  $^1\text{H}$  NMR spectrum of the starting *closo*-1,10- $\text{Me}_2\text{C}_2\text{B}_8\text{H}_8$  (**1b**). Ordered as assignment/ $\delta(^1\text{H}$  in ppm, relative to TMS). The broader signal at  $\sim 2.20$  ppm reflects the  $^1J_{\text{BH}}$  coupling combined with long-range couplings due to the two non equivalent CMe groups. The high-field impurities near  $\sim 0.00$  ppm are due to traces of silicon grease.

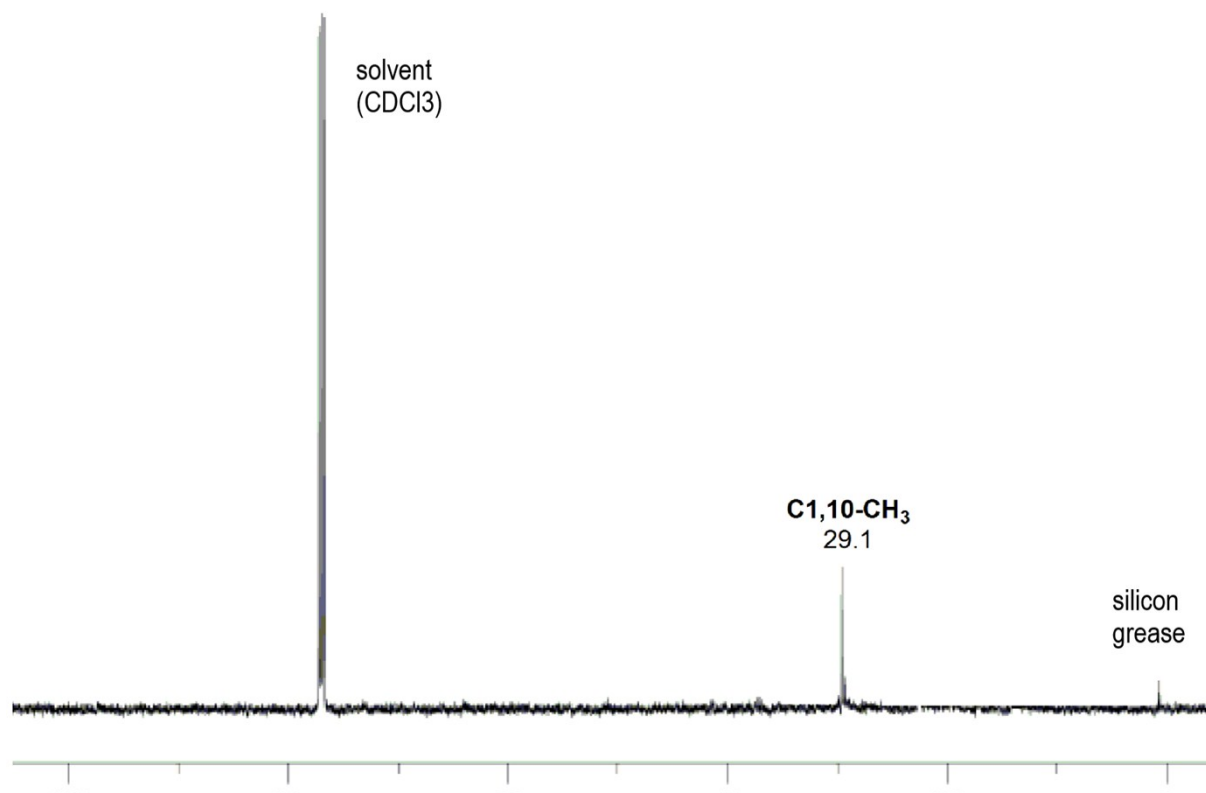

**Figure S6.** 150.9 MHz  $^{13}\text{C}$ - $\{^1\text{H}\}$  NMR spectrum of the starting *closo*-1,10- $\text{Me}_2\text{C}_2\text{B}_8\text{H}_8$  (**1b**). Ordered as assignment/ $\delta(^{13}\text{C})$  in ppm, relative to TMS).

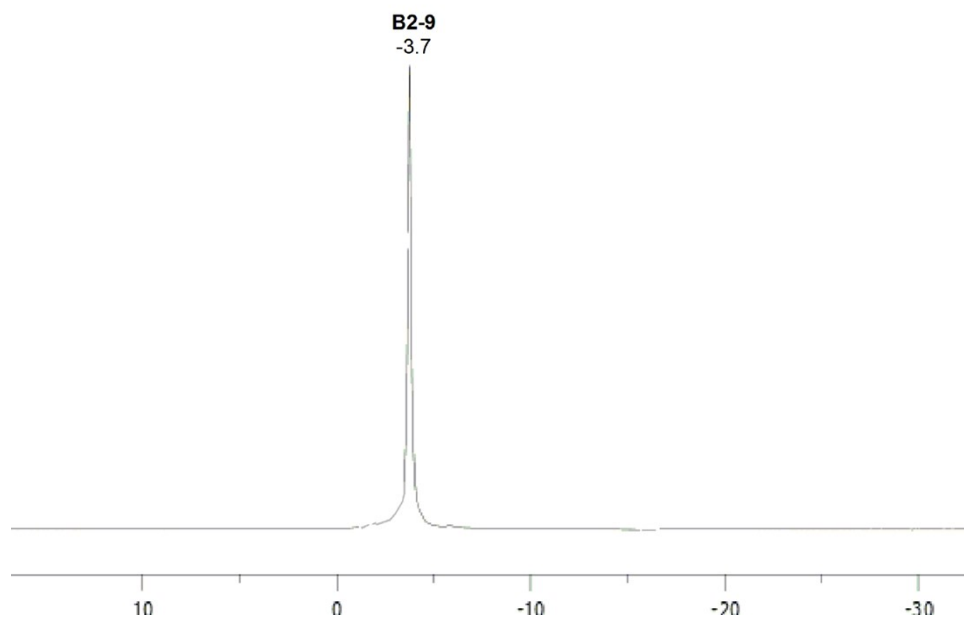

**Figure S7.** 190.2 MHz  $^{11}\text{B}$  NMR spectrum of *closo*-1,10- $\text{H}_2\text{C}_2\text{B}_8\text{Me}_8$  (**2a**). Ordered as assignment/ $\delta(^{11}\text{B}$  in ppm relative to  $\text{BF}_3\text{OEt}_2$ / $^1J_{\text{BH}}$  in Hz. The singlet shape proves the persubstitution by Me groups in all B-positions.

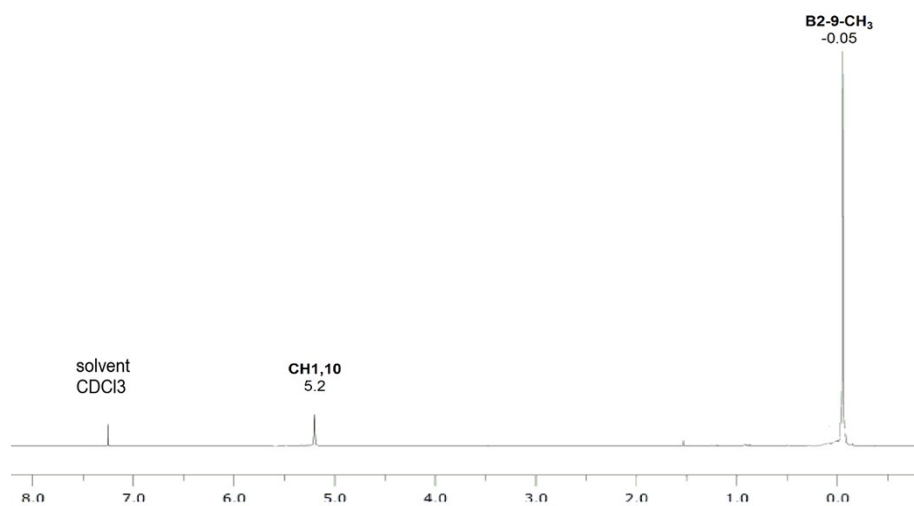

**Figure S8.** 600 MHz  $^1\text{H}$  NMR spectrum of *closo*-1,10- $\text{H}_2\text{C}_2\text{B}_8\text{Me}_8$  (**2a**). Ordered as assignment/ $\delta(^1\text{H}$  in ppm, relative to TMS). The high-field BMe signal at  $\sim -0.05$  ppm reflects absolutely clean permethylation in all B-sites.

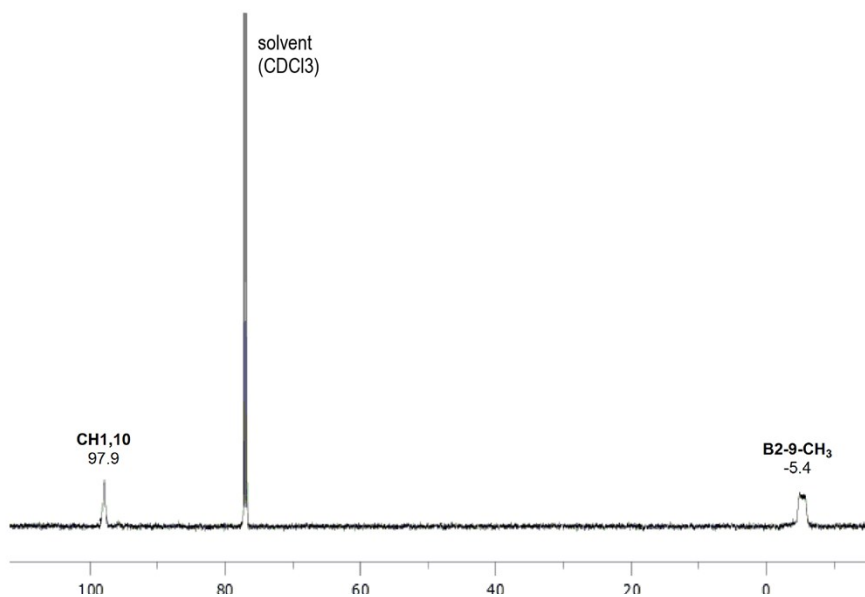

**Figure S9.** 150.9 MHz  $^{13}\text{C}$  NMR spectrum of *closo*-1,10- $\text{H}_2\text{C}_2\text{B}_8\text{Me}_8$  (**2a**). Ordered as assignment/ $\delta(^{13}\text{C}$  in ppm, relative to TMS).

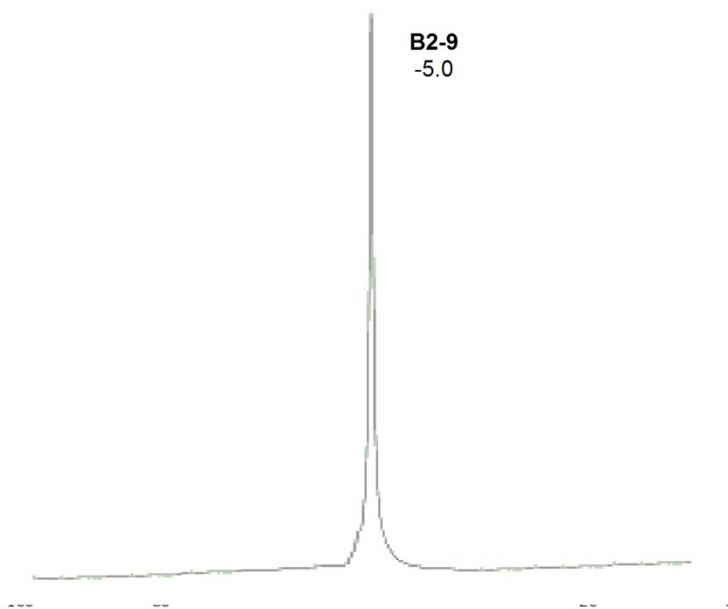

**Figure S.10** 190.2 MHz  $^{11}\text{B}$  NMR spectrum of *closo*-1,10- $\text{Me}_2\text{C}_2\text{B}_8\text{Me}_8$  (**2b**). Ordered as assignment/ $\delta(^{11}\text{B}$  in ppm relative to  $\text{BF}_3\text{OEt}_2$ ). The singlet shape proves the permethylation in all positions.

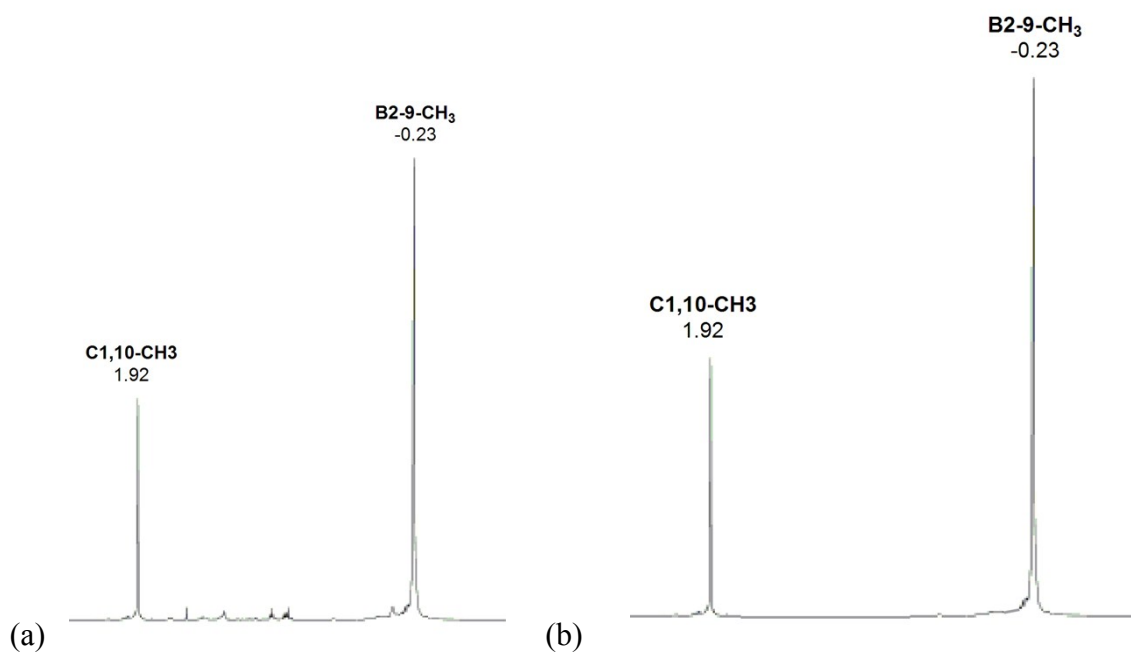

**Figure S 11.** 600 MHz  $^1\text{H}$  NMR spectra of *closo*-1,10- $\text{Me}_2\text{C}_2\text{B}_8\text{Me}_8$  (**2b**) (a) crude product (b) after sublimation removing the minor organic impurities. Ordered as assignment/ $\delta(^1\text{H}$  in ppm, relative to TMS).

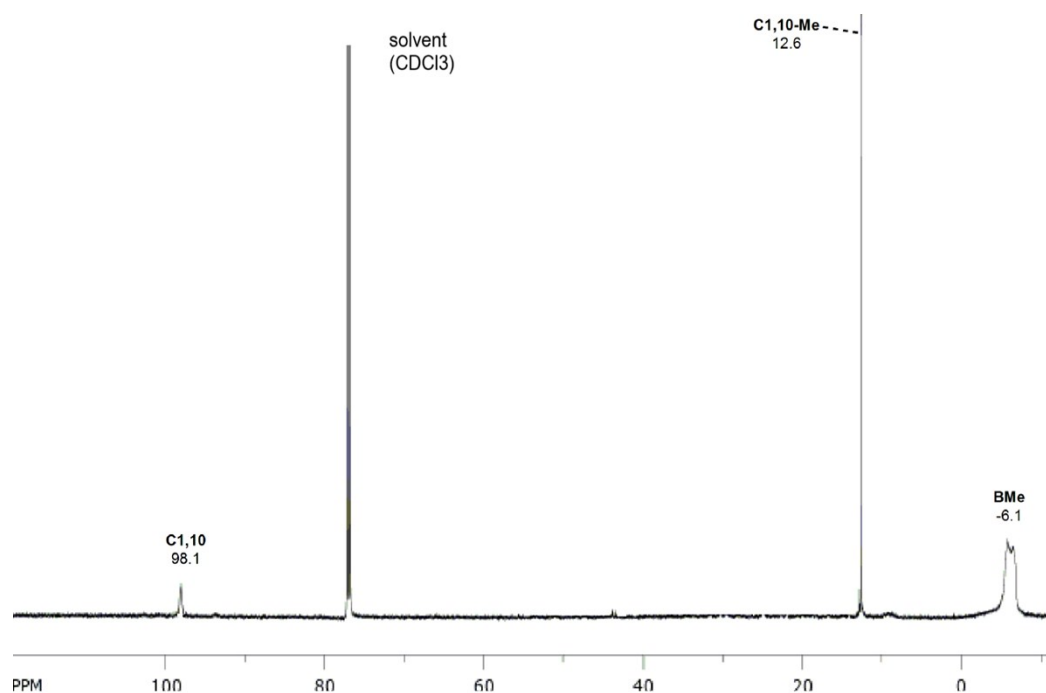

**Figure S 12.** 150.9 MHz  $^{13}\text{C}\{-^1\text{H}\}$  NMR spectrum of *closo*-1,10- $\text{Me}_2\text{C}_2\text{B}_8\text{Me}_8$  (**2b**). Ordered as assignment/ $\delta(^{13}\text{C}$  in ppm, relative to TMS).

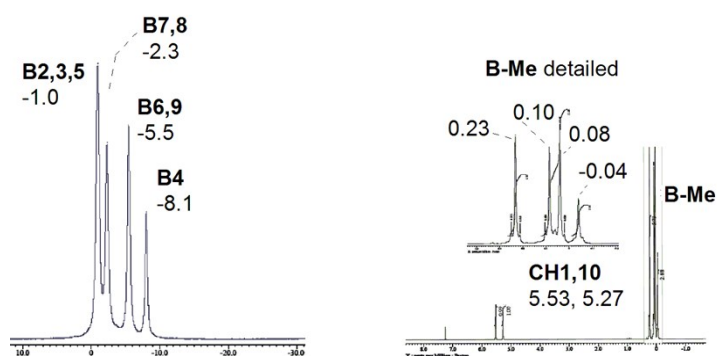

**Figure S13.** 190.2 MHz  $^{11}\text{B}$  (left) and 600 MHz  $^1\text{H}$  (right) NMR spectra of *closo*-1,10- $\text{H}_2\text{C}_2\text{B}_8\text{Me}_7\text{-2-OTf}$  (**5a**). Ordered as assignment/ $\delta(^{11}\text{B}$  in ppm relative to  $\text{BF}_3\text{OEt}_2$ ) or assignment/ $\delta(^1\text{H}$  in ppm, relative to TMS).

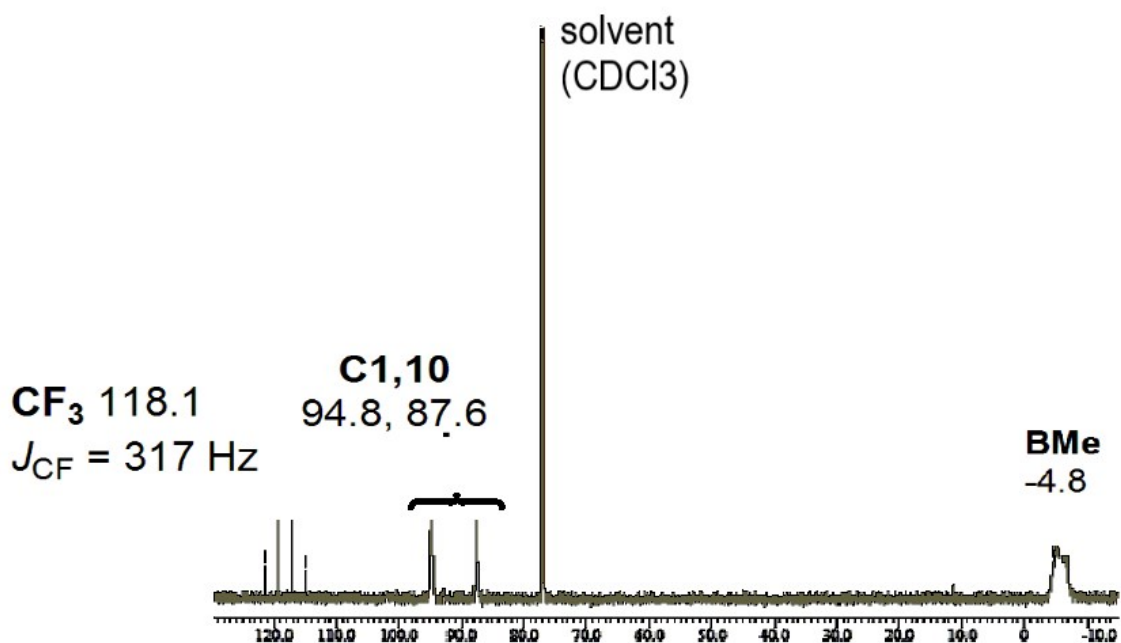

**Figure S14.** 150.9 MHz  $^{13}\text{C}\{-^1\text{H}\}$  NMR spectrum of *closo*-1,10- $\text{H}_2\text{C}_2\text{B}_8\text{Me}_7\text{-2-OTf}$  (**5a**). Ordered as assignment/ $\delta(^{13}\text{C}$  in ppm, relative to TMS).

Cartesian coordinates for *closo*-1,10- $\text{H}_2\text{C}_2\text{B}_8\text{Me}_8$  at the MP2/TZVP level

|   | <i>x</i> | <i>y</i> | <i>z</i> |
|---|----------|----------|----------|
| C | -0.00465 | -1.71799 | 0.59756  |
| B | -0.93171 | -1.27693 | -0.63233 |



|   |          |          |          |
|---|----------|----------|----------|
| B | 0.93432  | -1.27816 | -0.62378 |
| B | 0.92706  | -0.50506 | 1.07451  |
| B | -0.93903 | -0.50378 | 1.06593  |
| B | 0.00656  | -0.06157 | -1.60627 |
| B | 1.32085  | 0.48427  | -0.39931 |
| B | -0.00372 | 1.03182  | 0.79549  |
| B | -1.31808 | 0.48599  | -0.41151 |
| C | 0.00365  | 1.31214  | -0.78185 |
| H | -0.00732 | -2.7028  | 1.04595  |
| C | -1.95151 | -2.28565 | -1.30087 |
| C | 1.9586   | -2.28839 | -1.28313 |
| C | -1.96684 | -0.66534 | 2.25839  |
| C | 1.94354  | -0.66798 | 2.27646  |
| C | 0.01409  | -0.07487 | -3.18875 |
| C | -2.76222 | 1.07283  | -0.68448 |
| C | 2.76806  | 1.06941  | -0.6595  |
| C | -0.00799 | 2.21661  | 1.84464  |
| H | 0.00641  | 2.29693  | -1.2303  |
| H | -2.52396 | 0.25416  | 2.44892  |
| H | -2.69363 | -1.45528 | 2.04715  |
| H | -1.45438 | -0.9402  | 3.18506  |
| H | -2.50378 | -1.8275  | -2.12382 |
| H | -1.43347 | -3.16368 | -1.6978  |
| H | -2.68278 | -2.64692 | -0.57175 |
| H | 2.52488  | -1.82863 | -2.0956  |
| H | 2.6774   | -2.65781 | -0.54578 |
| H | 1.44154  | -3.16128 | -1.69253 |
| H | 2.50161  | 0.25014  | 2.47078  |
| H | 1.42179  | -0.93994 | 3.19879  |
| H | 2.66984  | -1.46041 | 2.07302  |
| H | 3.55363  | 0.38093  | -0.34165 |
| H | 2.92213  | 1.28004  | -1.72193 |
| H | -2.90451 | 1.29018  | -1.74719 |
| H | -3.55132 | 0.38256  | -0.37953 |
| H | -2.91465 | 2.01056  | -0.14195 |
| H | -0.88807 | 2.85348  | 1.71524  |
| H | -0.01077 | 1.85423  | 2.8746   |
| H | 0.87143  | 2.85541  | 1.72054  |
| H | 2.9146   | 2.0105   | -0.12124 |
| H | 0.01253  | -1.08964 | -3.59174 |
| H | -0.86184 | 0.44268  | -3.59093 |
| H | 0.89764  | 0.43638  | -3.58224 |

**Cartesian coordinates for *closo*-1,10-Me<sub>2</sub>C<sub>2</sub>B<sub>8</sub>Me<sub>8</sub> at the MP2/TZVP level**

|   |           |           |           |
|---|-----------|-----------|-----------|
| C | -1.683432 | 0.029319  | 0.005832  |
| B | -0.760123 | -0.589950 | 1.165592  |
| B | -0.731126 | 1.179253  | 0.604213  |
| B | -0.748730 | 0.620092  | -1.163514 |
| B | -0.777661 | -1.149359 | -0.605724 |

|   |           |           |           |
|---|-----------|-----------|-----------|
| B | 0.766468  | 0.382106  | 1.245774  |
| B | 0.775028  | 1.237618  | -0.402977 |
| B | 0.742441  | -0.408825 | -1.256792 |
| B | 0.733620  | -1.264508 | 0.388274  |
| C | 1.683479  | -0.028823 | -0.007648 |
| C | -3.186515 | 0.042219  | 0.019538  |
| C | -1.422330 | -1.246644 | 2.443946  |
| C | -1.355353 | 2.468153  | 1.276985  |
| C | -1.459779 | -2.418138 | -1.260864 |
| C | -1.392658 | 1.293113  | -2.442680 |
| C | 1.435961  | 0.807001  | 2.615158  |
| C | 1.361939  | -2.648984 | 0.826509  |
| C | 1.453634  | 2.601037  | -0.832989 |
| C | 1.378542  | -0.853410 | -2.635743 |
| C | 3.186554  | -0.046661 | -0.001020 |
| H | -3.561156 | 0.744023  | 0.767446  |
| H | -3.582614 | 0.338098  | -0.954033 |
| H | -3.575928 | -0.949394 | 0.258510  |
| H | -0.727549 | -3.112590 | -1.678082 |
| H | -2.051748 | -2.969011 | -0.522662 |
| H | -2.142006 | -2.130357 | -2.066921 |
| H | -0.678143 | -1.591996 | 3.164651  |
| H | -2.078607 | -0.537653 | 2.958501  |
| H | -2.037876 | -2.108796 | 2.167407  |
| H | -0.589450 | 3.178373  | 1.595580  |
| H | -2.026571 | 2.990700  | 0.588280  |
| H | -1.944945 | 2.203008  | 2.160631  |
| H | -0.636263 | 1.670921  | -3.133809 |
| H | -2.013096 | 0.578452  | -2.993029 |
| H | -2.038028 | 2.133019  | -2.166805 |
| H | 2.068634  | 1.691021  | 2.485637  |
| H | 0.695752  | 1.041614  | 3.382982  |
| H | 2.077002  | 0.010164  | 3.005538  |
| H | 2.135538  | 2.456915  | -1.676875 |
| H | 0.719053  | 3.354506  | -1.124859 |
| H | 2.044844  | 3.019672  | -0.011961 |
| H | 3.578788  | -0.273779 | -0.994435 |
| H | 3.580625  | 0.923799  | 0.307190  |
| H | 3.560446  | -0.801468 | 0.693721  |
| H | 1.949789  | -2.539546 | 1.743725  |
| H | 0.598702  | -3.406782 | 1.015532  |
| H | 2.036107  | -3.040784 | 0.058489  |
| H | 2.010655  | -1.738616 | -2.513152 |
| H | 0.617705  | -1.092467 | -3.381734 |
| H | 2.010499  | -0.062265 | -3.051834 |

Computed  $^{11}\text{B}$  NMR (GIAO-MP2/II//MP2/TZVP), in ppm with respect to  $\text{BF}_3\cdot\text{OEt}_2$

-12.6 ppm **4a**

-0.8 ppm **4c**

-2.4 ppm **4d**
